# Supplementary material for: Microbiome dataset from the upper respiratory tract of patients living with HIV, HIV/TB and TB from Myanmar
Source: PubMed Central journal article supplement (PMC6197770; doi:10.1016/j.dib.2018.10.003), 2018-10-04
Supplement: mmc1.pdf [file mmc1.pdf]

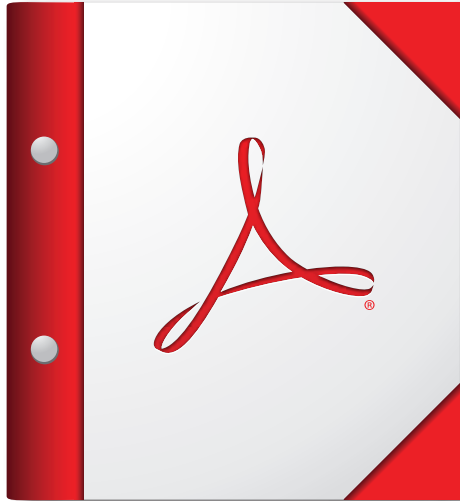

**For the best experience, open this PDF portfolio in  
Acrobat X or Adobe Reader X, or later.**

[Get Adobe Reader Now!](#)
